# Supplementary material for: Identifying the prognostic significance of early arrhythmia recurrence during the blanking period and the optimal blanking period duration: insights from the DECAAF II study
Source: PubMed Central journal article supplement — Europace. 2023 Jun 20;25(6):euad173. doi: 10.1093/europace/euad173 (PMC10292951; doi:10.1093/europace/euad173), 2023-06-20
Supplement: euad173_supplementary_data.pdf [file euad173_supplementary_data.pdf]

**Supplementary material:**

|                          | <b>Month 1 of BP (n= 8057)</b> | <b>Month 2 of BP (n= 4446)</b> | <b>Month 3 of BP (n= 9108)</b> | <b>Rest of Follow-up (n=209952)</b> |
|--------------------------|--------------------------------|--------------------------------|--------------------------------|-------------------------------------|
| <b>AF (%)</b>            | 19.4%                          | 13.1%                          | 10.9%                          | 11.0%                               |
| <b>A Flutter (%)</b>     | 1.3%                           | 1.4%                           | 0.9%                           | 1.2%                                |
| <b>A Tachycardia (%)</b> | 0.1%                           | 0.1%                           | 0.1%                           | 0.1%                                |
| <b>Sinus Rhythm (%)</b>  | 79.3%                          | 85.4%                          | 88.1%                          | 87.7%                               |

**Table S1:** Classification and prevalence of the different ECG patterns during and after the blanking period. the sample size reflects the number of ECG strips submitted during the specified period.

|                                       | <b>No recurrence (N=362)</b> | <b>Recurrence of AA (N=326)</b> | <b>Total (N=688)</b> | <b>p-value</b> |
|---------------------------------------|------------------------------|---------------------------------|----------------------|----------------|
| <b>Conventional PVI</b>               | 182 (50.3%)                  | 166 (50.9%)                     | 348 (50.6%)          | 0.87           |
| <b>PVI + Fibrosis-guided ablation</b> | 180 (49.7%)                  | 160 (49.1%)                     | 340 (49.4%)          |                |

**Table S2:** Effect of the initial randomization of the DECAAF II trial

|                                      | <b>AF After BP (N=130)</b> | <b>AF Within BP (N=287)</b> | <b>No AF (N=271)</b> | <b>Total (N=688)</b> | <b>p-value</b> |
|--------------------------------------|----------------------------|-----------------------------|----------------------|----------------------|----------------|
| <b>Baseline Fibrosis Mean % (SD)</b> | 18.32 (7.65)               | 19.61 (7.46)                | 17.82 (7.05)         | 18.66 (7.37)         | 0.0121         |
| <b>Ablation Scar Mean % (SD)</b>     | 9.28 (5.07)                | 9.41 (4.94)                 | 10.35 (5.13)         | 9.75 (5.05)          | 0.0422         |

**Table S3:** Effect of baseline fibrosis and ablation scar on early recurrence of arrhythmia and late recurrence
